# Supplementary material
Source: Springer Nature journal article supplement (https://www.springermedizin.de/resource/supplementary/13054_2010_8862_MOESM6_ESM.pdf/9732774)

# Funnel Plot of Standard Error by Log odds ratio

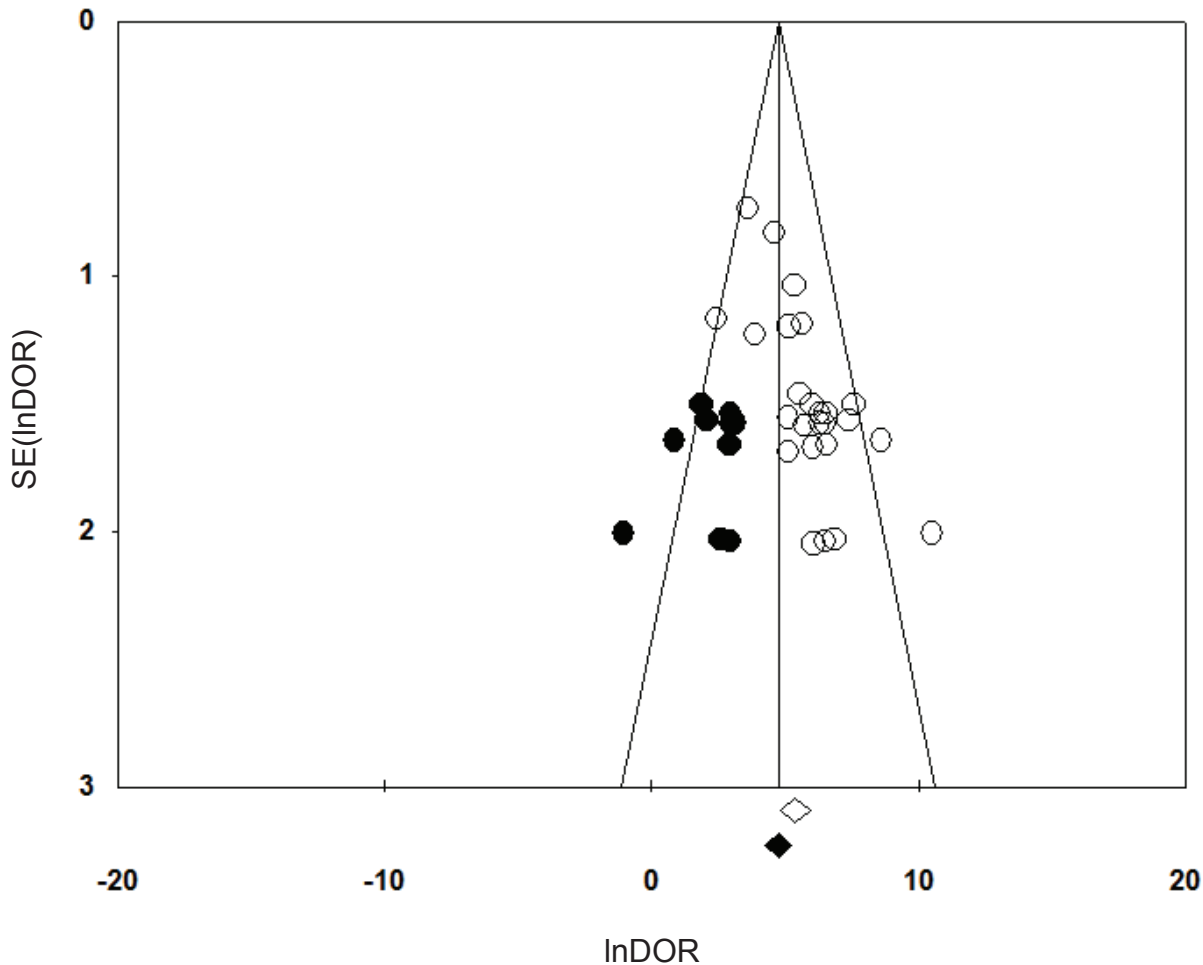

Supplement: MOESM6 [file 9732774]
